# Supplementary material for: Survey of Pathogen-Lowering and Immuno-Modulatory Effects Upon Treatment of Campylobacter coli-Infected Secondary Abiotic IL-10−/− Mice with the Probiotic Formulation Aviguard®
Source: MDPI journal article supplement (doi:10.3390/microorganisms9061127), 2021-05-23
Supplement: s1 [file s1]

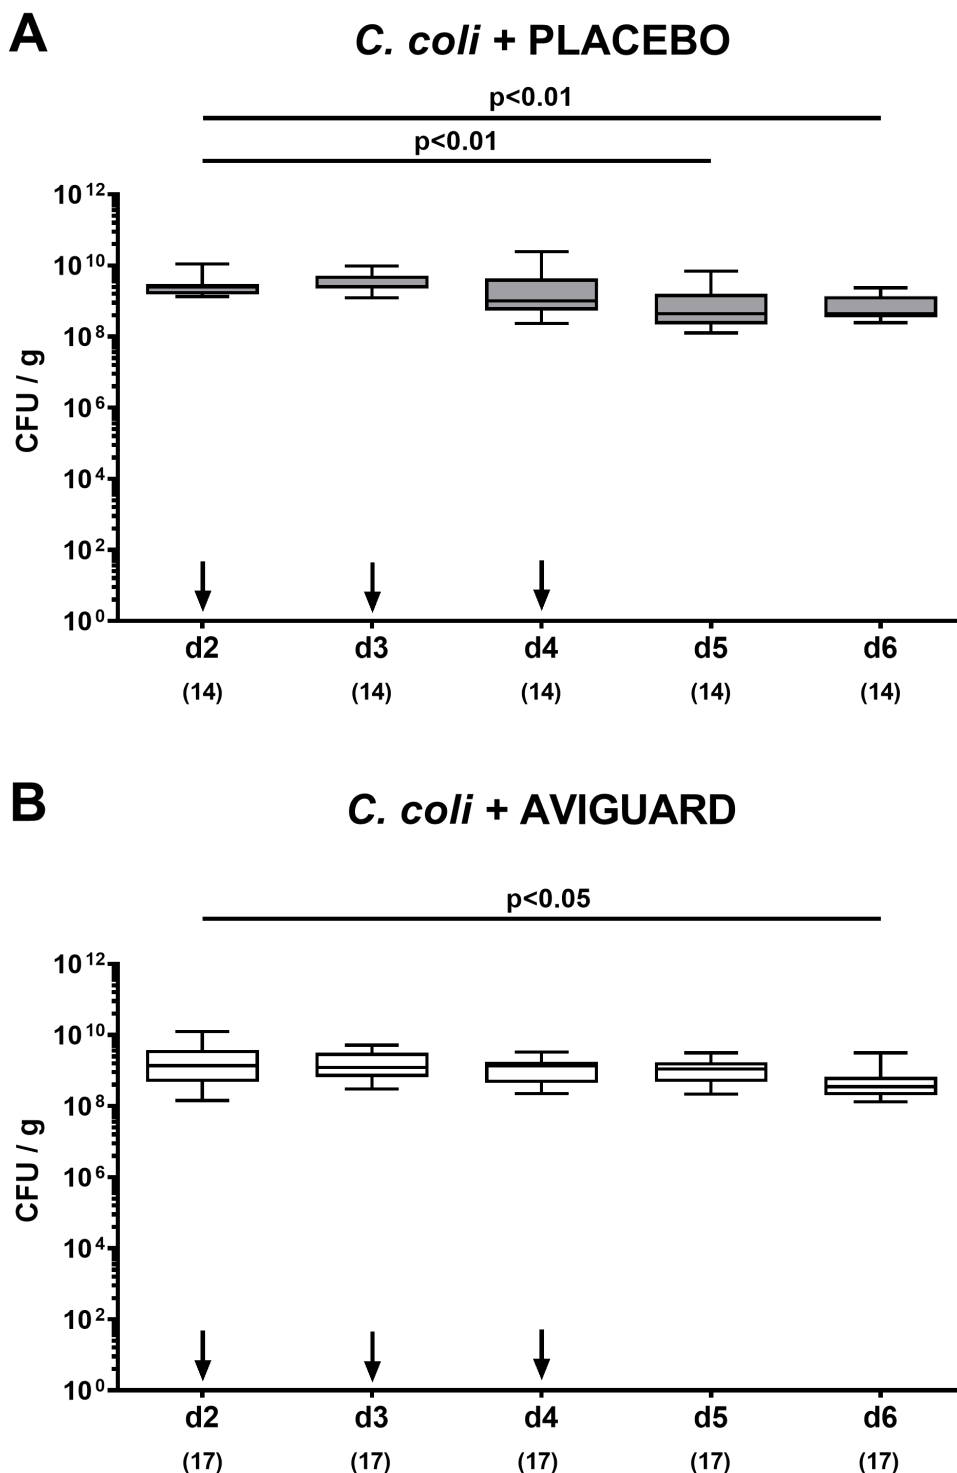

**Supplementary Figure S2:** Fecal pathogen loads over time following peroral application of placebo versus the commercial competitive exclusion product Aviguard® to *C. coli* infected secondary abiotic IL-10<sup>-/-</sup> mice. Secondary abiotic IL-10<sup>-/-</sup> mice were infected with a *C. coli* patient isolate on day (d) 0 and d1 by gavage. On d2, d3 and d4 post-infection (arrows) mice were perorally challenged with either **(A)** placebo (grey boxes) or **(B)** with the commercial competitive exclusion product Aviguard® (white boxes). The fecal *C. coli* loads were quantitatively assessed by culture (in colony forming units per g, CFU / g). The box plots indicate the 25<sup>th</sup> and 75<sup>th</sup> percentiles of the medians (bar within boxes). The total ranges, the significance levels (p values, versus d2) calculated by the Mann Whitney U test and the numbers of analyzed mice (in parentheses) are given. Shown data were derived from three independent experiments.
