# Supplementary material for: Survey of Pathogen-Lowering and Immuno-Modulatory Effects Upon Treatment of Campylobacter coli-Infected Secondary Abiotic IL-10−/− Mice with the Probiotic Formulation Aviguard®
Source: MDPI journal article supplement (doi:10.3390/microorganisms9061127), 2021-05-23
Supplement: s1 [file s1]

## A Aviguard® Suspension - Culture

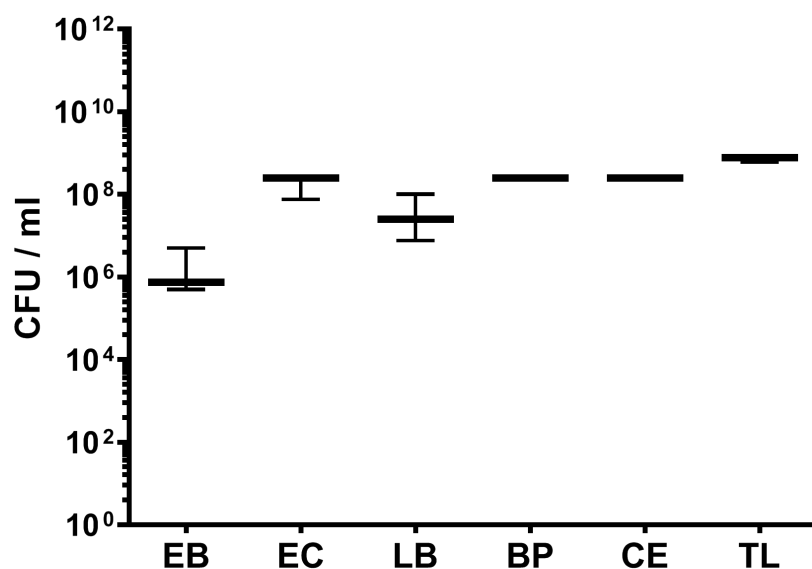

## B Aviguard® Suspension - Molecular

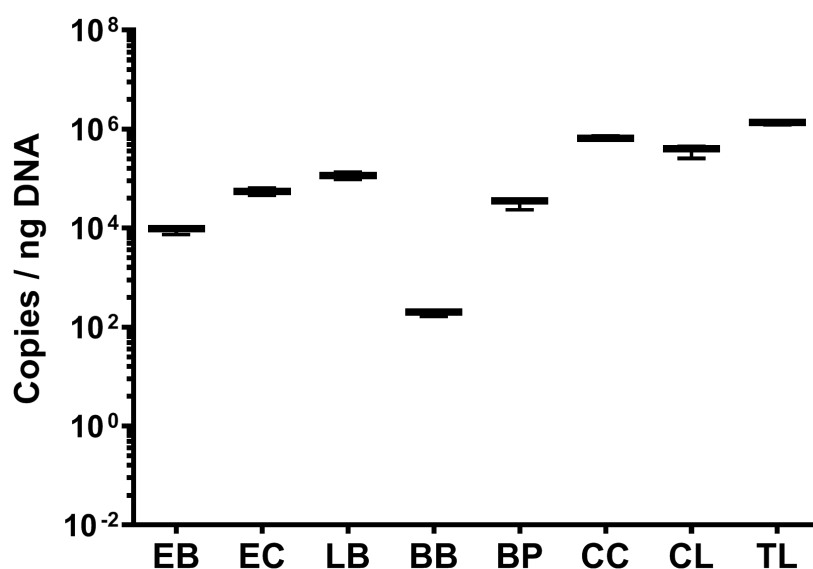

**Supplementary Figure S1:** Bacterial composition of Aviguard® suspensions used for the treatment of *C. coli* infected secondary abiotic IL-10<sup>-/-</sup> mice. Mice were infected with a *C. coli* patient isolate on day (d) 0 and d1 by gavage and perorally challenged with the commercial competitive exclusion product Aviguard® on d2, d3 and d4 post-infection (p.i.). The composition of the applied bacterial suspensions was quantitatively surveyed by (A) culture (expressed as colony forming units per g, CFU / g) and by (B) molecular (i.e., 16S rRNA based) methods (expressed as copies / ng DNA). The box plots indicating the 25<sup>th</sup> and 75<sup>th</sup> percentiles of the medians (bar within boxes) and the total ranges are given. Shown data were derived from three independent experiments. TL, total bacterial load; EB, *Enterobacteriaceae*; EC, *Enterococcus* genus; LB, *Lactobacillus* group; BP, *Bacteroides/Prevotella* group; CE, *Clostridium/Eubacterium* species; BB, *Bifidobacterium* genus; CC, *Clostridium coccoides* group; CL, *Clostridium leptum* group.
